# Supplementary material for: Differential regulation of embryonic and adult β cell replication
Source: PubMed Central journal article supplement — Cell Cycle. 2012 Jul 1;11(13):2431–42. doi: 10.4161/cc.20545 (PMC3404874; doi:10.4161/cc.20545), 2012-07-01
Supplement: cc-11-2431-s01.pdf [file cc-11-2431-s01.pdf]

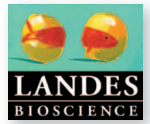

## **Supplemental Material to:**

**Uma Gunasekaran, Courtney W. Hudgens,  
Brian T. Wright, Matthew F. Maulis,  
and Maureen Gannon**

**Differential regulation of embryonic  
and adult  $\beta$  cell replication**

**2012; 11(11)**

**<http://dx.doi.org/10.4161/cc>.**

**<http://www.landesbioscience.com/journals/cc/article/20545>**

## Supplemental Figure 1

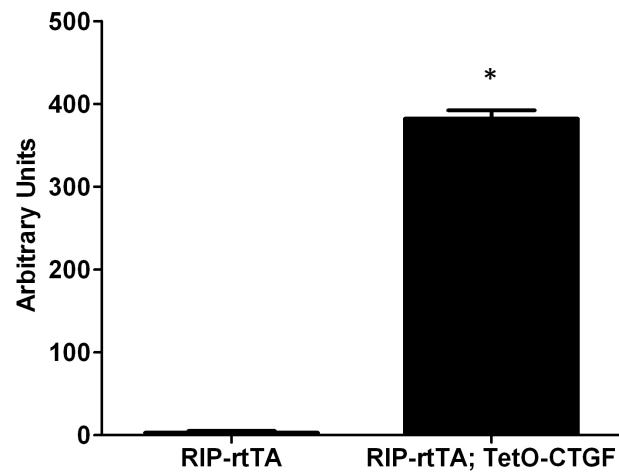

**Supplemental Figure 1. Quantitative real time PCR (qRT-PCR) of total *Ctgf* expression.** 6.5-7.5 week old control and bigenic mice were treated with doxycycline for one week. qRT-PCR of isolated islets revealed an almost 400-fold increase in total *Ctgf* expression in bigenic islets. \*  $p=0.02$ ,  $n=2$  for each genotype.

## Supplemental Figure 2

RIP-rtTA

RIP-rtTA; TetO-CTGF

ducts

islet

ducts

islet

1 week DOX

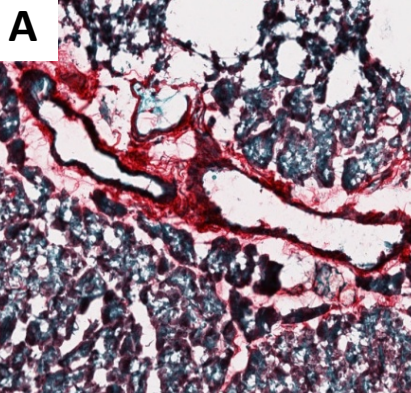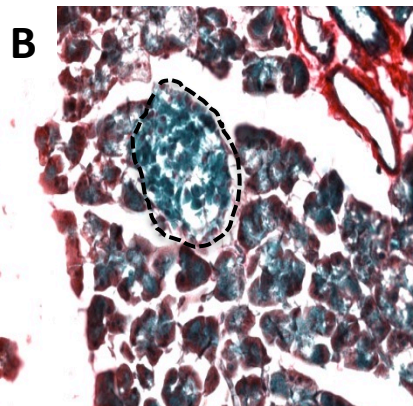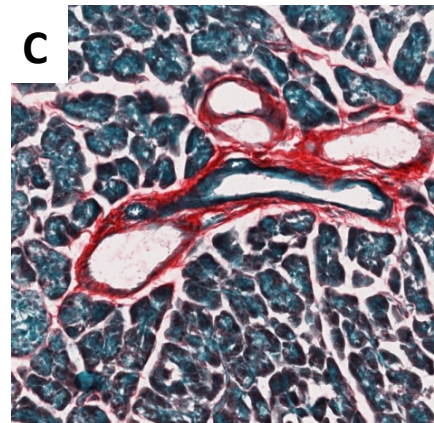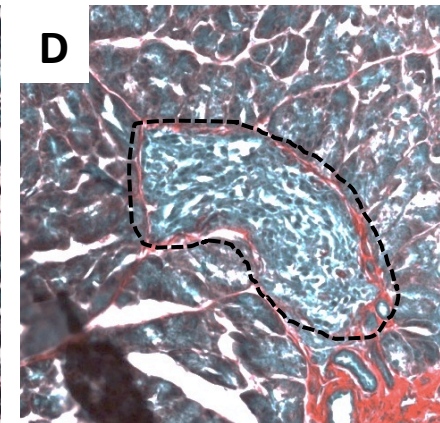

5 weeks DOX

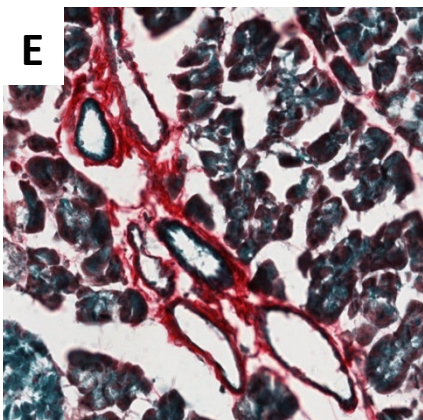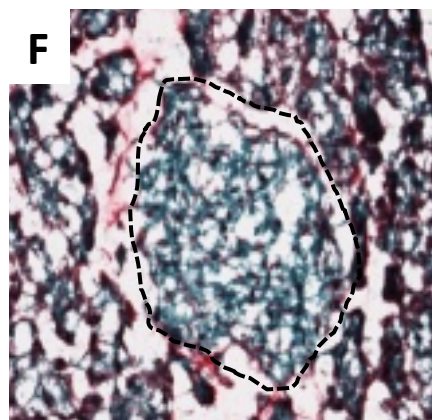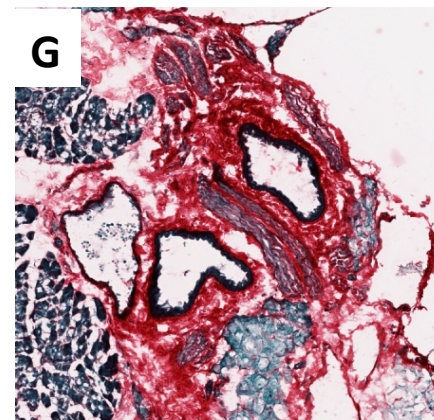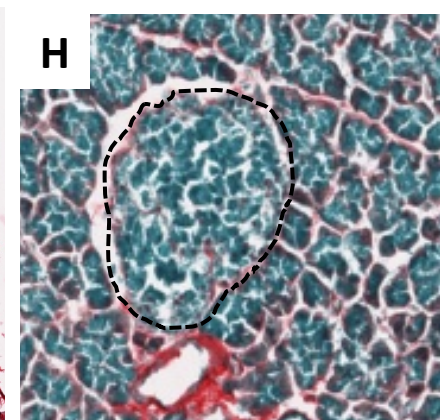

**Supplemental Figure 2. Assessment of collagen deposition after CTGF over-expression.** (A-D) Direct Red 80/Fast Green staining of ~8 week old pancreata for collagen (red) revealed no increase in peri-ductal, peri-vascular, or peri-islet collagen deposition after one week of CTGF induction (C, D) compared with controls (A, B). (E-H) However, after five weeks of CTGF induction, there is evidence of increased peri-ductal and peri-vascular collagen (compare G with E), with no increase in peri-islet collagen (compare F and H). Islets are circled with dotted lines in B, D, F, and H. Magnification 100X for ducts and vessels, 5X for islets.
